# Supplementary material for: Biomarkers of Neurological Damage: From Acute Stage to Post-Acute Sequelae of COVID-19
Source: MDPI journal article supplement (doi:10.3390/cells12182270), 2023-09-13
Supplement: s1 [file s1]

**Table S1. Demographic and clinical characteristics of 117 living COVID-19 patients stratified by post-COVID visit receiving.**

|                                       | Post-COVID visit |                | p value* |
|---------------------------------------|------------------|----------------|----------|
|                                       | Accept (n=77)    | Decline (n=40) |          |
| <b>Female, n (%)</b>                  | 36 (46.8)        | 20 (50.0)      | ns       |
| <b>Age, median (IQR) (years)</b>      | 60 (52-71)       | 66 (57-70)     | ns       |
| <b>Severe COVID-19, n (%)</b>         | 34 (44.2)        | 25 (62.5)      | ns       |
| <b>Comorbidity</b>                    |                  |                |          |
| Any, n (%)                            | 46 (59.7)        | 21 (52.5)      | ns       |
| Hypertension, n (%)                   | 29 (36.7)        | 14 (35.0)      | ns       |
| Cardiovascular, n (%)                 | 9 (11.7)         | 7 (17.5)       | ns       |
| Diabetes, n (%)                       | 13 (16.9)        | 5 (12.5)       | ns       |
| Pulmonary, n (%)                      | 8 (10.4)         | 7 (17.5)       | ns       |
| Cancer, n (%)                         | 5 (6.5)          | 2 (5.0)        | ns       |
| Renal, n (%)                          | 2 (2.6)          | 1 (2.5)        | ns       |
| <b>Symptoms on hospital admission</b> |                  |                |          |
| Fever, n (%)                          | 67 (87.0)        | 16 (40.0)      | <0.0001  |
| Cough, n (%)                          | 39 (50.6)        | 6 (15.0)       | 0.0001   |
| Shortness of breath, n (%)            | 23 (29.9)        | 5 (12.5)       | 0.0416   |
| Myalgia or arthralgia, n (%)          | 25 (32.5)        | 5 (12.5)       | 0.0249   |
| Diarrhea, n (%)                       | 12 (15.6)        | 0 (0)          | 0.0078   |
| Anosmia and ageusia, n (%)            | 5 (6.5)          | 0 (0)          | ns       |
| Sputum production, n (%)              | 2 (2.6)          | 0 (0)          | ns       |
| Neurological, n (%)                   | 5 (6.5)          | 7 (17.5)       | ns       |

n: number, IQR: interquartile range. The 2-tailed X<sup>2</sup> test or Fisher's exact test and the nonparametric comparative Mann-Whitney test were used for comparing proportions and medians, respectively, between accept and decline groups.

Figure S1. (A) Longitudinal evaluation of NfL, GFAP and sCD163 plasma levels according to pulmonary and/or renal comorbidity and (B) according to neurological symptoms presence on hospital admission.

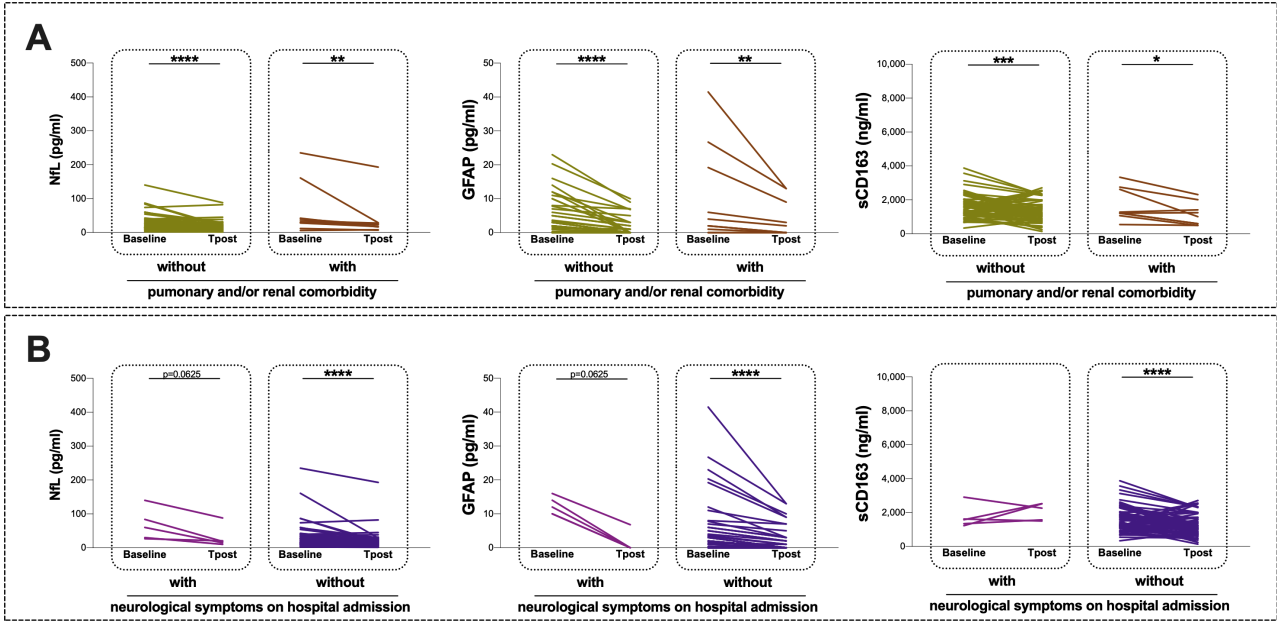

NfL: neurofilament light chain, GFAP: glial fibrillary acidic protein, sCD163: soluble CD163. \*: 0.05<p<0.01; \*\*: 0.01<p<0.001; \*\*\*: 0.001<p<0.0001; \*\*\*\*: p>0.0001.
